# Supplementary material
Source: publisher site journal article supplement (https://www.dovepress.com/article/386328)
Supplement: Supplementary file 1 [file get_supplementary_file.php]

**Supplementary materials**

**Table S1: Case report form used for validation the diagnosis code for fever of unknown origin chapter R50 (ex. R502)**

| **Anonymous number ………………………………… Gender:**  **Diagnosis code and date……………………………. Age:**  **Hospital and department …………………………………………………………** | | **Validated by:**  **……………………………………………** |
| --- | --- | --- |
|  | **Mandatory Information** | **Supplemental Information** |
| Definition | - Temperature ≥38.0 multiple times over a minimum of 3 weeks - Undiagnosed cause | - Work-up in outpatient setting or during admission ≥1 week |
| Patient history | - Fever description - Prior diseases | - Travel history <1 year - Animal exposure - Sexual exposure - Drug-associated fever - Localized symptoms |
| Blood tests | - CRP, leucocytes incl. differential count, SR, PCT - Hgb, platelets, MCV, EVF - ALAT, alkaline phosphatase, LDH, bilirubin, INR, amylase - Creatinine, carbamide, Na, K, Ca, albumin - TSH, T3, T4 - Rheumatoid factor, ANCA, ANA, se-ACE - HIV, immunoglobulins, M-component, p-lambda og kappa-chains - CMV- and EBV-antibodies - Ferritin, fibrinogen, D-dimer | - Hepatitis screening - Quantiferon - Tumor markers   (CA-125, CEA, PSA)   - Serology   (WR, Parvovirus-B19, Toxoplasmosis, *Bartonella henselea, Coxiella burnetii, Yersinia enterocolitica*) |
| Microbiology | - Blood culture x 3 |  |
| Imaging | - Thoracic x-ray and/or CT-thorax/abdomen | - PET-CT, MR-columna - Echocardiography |
| Other examinations |  | - Bone marrow biopsy - Lumbar puncture - A. temporalis biopsy - Biopsy for skin lesions - Gynecological examination - Endoscopy |
| **Conclusion: Fever of unknown origin - correct diagnosis** **YES NO LIKELY**  If no/likely describe other disease/cause noted in the discharge file ……………………………………………… | | |
| **Underlying chronic diseases (ICD-10 code and disease)**  Solid cancer  Hematological cancer  Rheumatoid disease or autoimmune disease  Immunosuppressive treatment (eg MTX, prednisolone, antibodies etc) | | |
